# Supplementary material for: Histone acetyltransferase HAT4 modulates navigation across G2/M and re-entry into G1 in Leishmania donovani
Source: PubMed Central journal article supplement (PMC4897741; doi:10.1038/srep27510), 2016-06-08
Supplement: srep27510-s1.pdf [file srep27510-s1.pdf]

# **Histone acetyltransferase HAT4 modulates navigation across G2/M and re-entry into G1 in *Leishmania donovani***

Aarti Yadav, Udit Chandra & Swati Saha\*

Department of Microbiology, University of Delhi South Campus, New Delhi-110021, India.

Running Head: Functional role of *Leishmania* histone acetylase HAT4

\*Address correspondence to Swati Saha, [ss5gp@yahoo.co.in](mailto:ss5gp@yahoo.co.in)

**Keywords:** *Leishmania*, histone acetyltransferase, MYST family, chromatin, histone modification, trypanosomatid, Cdc20

## Supplementary Methods:

### *Construction of knockout and rescue plasmids*

Knockout constructs were made using two backbone vectors – pLEXSY\_I-egfp-neo3 (purchased from Jena Biosciences, Germany), and pLEXSY-eGFP-hyg that was made as part of this study. To make pLEXSY-eGFP-hyg, the *hyg<sup>r</sup>* cassette was amplified from pUC/*hygro* template<sup>13</sup> using primers Hyg-F/pLEXSY-eGFP and Hyg-R/pLEXSY-eGFP (5'-TCGGATCCAATATGAAAAAGCCTGAACTC-3' and 5'-TCACTAGTCTACTCTATTCCTTTGCCCT-3'), and the amplicon cloned into the BamHI-SpeI sites of plasmid pLEXSY\_I-egfp-neo3, thus replacing the *neo<sup>r</sup>* cassette with the *hyg<sup>r</sup>* cassette.

The 5' and 3' flank sequences of HAT4 were amplified off genomic DNA using suitable primers (HAT4-5'FL-F and HAT4-5'FL-R for 5' flank sequence: 5'-TCGCGGCCGCGATATCTCCACTGTGTGCCCGCACGCT-3' and 5'-TCGCGGCCGCGTGTAAGGCCCCACCCCTGCGCT-3' respectively; and HAT4-3'FL-F and HAT4-3'FL-R for 3' flank sequence: 5'-TCACTAGTACAGTATTCATGGAGGTGCAGAGAGG-3' and 5'-TCACTAGTGATATCCACACCCGCACACGTACGT-3' respectively). The 5' flank sequence was cloned into the NotI site of both vectors (pLEXSY\_I-egfp-neo3 and pLEXSY-eGFP-hyg), and the 3' flank sequence was cloned into the SpeI site of the two 5' flank clones generated. The orientation of inserts in all clones were checked with appropriate restriction digestion, and donor cassettes for homologous recombination were released from the two donor plasmids *HAT4-KO/neo* and *HAT4-KO/hyg* using EcoRV digestion (as indicated in bold lettering in primer sequences above). The donor cassette DNA fragments were gel purified prior to transfections for homologous recombination.

To construct the rescue plasmid pXG(*bleo*)/HAT4-FLAG, the LdHAT4 gene was transferred from plasmid pXG/HAT4-GFP<sup>12</sup> to pXG(*bleo*)/FLAG<sup>13</sup> using BamHI-EcoRV sites.

### ***Cloning of Ldc20 gene and expression in Leishmania promastigotes***

The gene encoding LdCdc20 was amplified using genomic DNA template and primers LdCdc20-F and LdCdc20-R (5'- CACCCCATGGCCACCATGGAGTTCAGAAC AC-3' and 5'- ACCATGGCTCCTCGCAGCTCAATCTCT - 3'), and the amplicon cloned into the NcoI site of pLEXSY\_I-egfp-neo3 in order to express LdCdc20 in fusion with eGFP at its C-terminus. The neomycin resistance cassette in this clone (pLEXSY-LdCdc20-eGFP/neo) was then replaced with a blebbistatin cassette (released from the plasmid pLEXSY\_I-blebbistatin3 by BamHI-SpeI restriction digestion and cloned into BamHI-SpeI sites of pLEXSY-LdCdc20-eGFP/neo) to create the plasmid pLEXSY-LdCdc20-eGFP/blebbistatin. While the pLEXSY\_I-egfp vectors are designed to be tet-inducible vectors, experiments in our laboratory with six different proteins have found that the promoter in case of pLEXSY\_I-egfp-neo3 supports the constitutive expression of eGFP fusion proteins in *Leishmania donovani* 1S (based on western blots as well as immunofluorescence analysis), and thus we have been using this vector for constitutive ectopic expression of proteins. The plasmid pLEXSY-LdCdc20-eGFP/blebbistatin was transfected into LdHAT4-KO cells and clones selected for using all three drugs (neomycin, hygromycin and bleomycin). LdCdc20 expression in clones was analyzed by microscopy, and a clone showing expression in more than 90% cells was used for further analysis.

## Supplementary Data

Table S1: Flow cytometry analysis of HU-synchronized HAT4-nulls

| Timepoints |      | Ld1S-neo/hyg | LdHAT4-KO  |
|------------|------|--------------|------------|
| log        | G1   | 48.34±0.76   | 47.04±0.67 |
|            | S    | 23.30±1.23   | 24.09±0.07 |
|            | G2/M | 26.54±0.30   | 25.81±0.72 |
| HU         | G1   | 66.45±1.32   | 65.08±1.54 |
|            | S    | 17.66±1.27   | 20.86±1.48 |
|            | G2/M | 13.82±1.04   | 12.89±1.23 |
| 3h R       | G1   | 13.86±0.47   | 18.74±1.85 |
|            | S    | 62.83±1.43   | 61.96±1.53 |
|            | G2/M | 21.38±0.91   | 18.24±1.01 |
| 4.5h R     | G1   | 9.68±0.95    | 13.53±1.06 |
|            | S    | 49.16±2.32   | 56.25±3.75 |
|            | G2/M | 40.29±3.74   | 29.66±3.74 |
| 6.5h R     | G1   | 22.20±0.43   | 13.25±1.15 |
|            | S    | 24.42±4.32   | 37.04±2.04 |
|            | G2/M | 51.16±3.77   | 47.49±2.48 |
| 10h R      | G1   | 40.11*       | 18.8*      |
|            | S    | 23.38*       | 28.62*     |
|            | G2/M | 34.21*       | 47.66*     |
| 12h R      | G1   | 42.44*       | 25.77*     |
|            | S    | 24.06*       | 29.40*     |
|            | G2/M | 30.84*       | 41.12*     |

Three independent experiments were carried out. In every experiment, for each time-point 30,000 events were recorded per cell line. Numbers represent percent of analyzed cells (mean of three experiments) and numbers following ± sign represent s.e.m. values. \* indicates mean of two experiments. HU: hydroxyurea.

Table S2: Flow cytometry analysis of FP-synchronized HAT4-nulls

| Timepoints |      | Ld1S-neo/hyg | LdHAT4-KO  |
|------------|------|--------------|------------|
| log        | G1   | 50.02±0.45   | 46.01±0.16 |
|            | S    | 21.19±0.74   | 21.94±0.58 |
|            | G2/M | 25.95±1.25   | 29.79±0.75 |
| FP         | G1   | 12.68±1.28   | 8.82±0.73  |
|            | S    | 10.58±0.61   | 11.02±0.45 |
|            | G2/M | 75.50±0.80   | 77.99±1.95 |
| 0.5h R     | G1   | 14.32±1.50   | 10.95±0.60 |
|            | S    | 14.92±1.76   | 18.22±1.34 |
|            | G2/M | 68.31±0.39   | 70.90±2.29 |
| 1.5h R     | G1   | 37.10±1.76   | 20.04±3.51 |
|            | S    | 9.39±0.63    | 18.45±3.83 |
|            | G2/M | 49.64±3.62   | 61.01±0.71 |
| 2h R       | G1   | 68.14±3.06   | 59.37±4.85 |
|            | S    | 18.7±2.07    | 7.97±0.77  |
|            | G2/M | 10.51±0.95   | 30.59±3.10 |

Three independent experiments were carried out. In every experiment, for each time-point 30,000 events were recorded per cell line. Numbers represent percent of analyzed cells (mean of three experiments) and numbers following ± sign represent s.e.m. values. FP: Flavopiridol.

Table S3: Downregulated genes in HAT4-nulls

| Probe Name/<br>Gene number | P value | Fold Change<br>experiment 1 | Fold Change<br>experiment 2 | Average<br>Fold Change | Regulation | Description                                                  |
|----------------------------|---------|-----------------------------|-----------------------------|------------------------|------------|--------------------------------------------------------------|
| LDBPK_220500               | 0.0132  | 5.0281                      | 4.8905                      | 4.9593                 | Down       | Hypothetical protein                                         |
| LDBPK_320110               | 0.0009  | 2.0705                      | 2.1435                      | 2.1070                 | Down       | Mitochondrial carrier protein                                |
| LDBPK_322590               | 0.0032  | 2.0139                      | 2.1885                      | 2.1012                 | Down       | Mitochondrial RNA binding complex 1 subunit                  |
| LDBPK_272330               | 0.0967  | 1.815                       | 2.2815                      | 2.0483                 | Down       | Hypothetical protein                                         |
| LDBPK_343610               | 0.0440  | 2.042                       | 1.8531                      | 1.9476                 | Down       | Hypothetical protein                                         |
| LDBPK_070070               | 0.0919  | 1.7411                      | 2.0279                      | 1.8845                 | Down       | Hypothetical protein                                         |
| LDBPK_020170               | 0.0123  | 1.8921                      | 1.8661                      | 1.8791                 | Down       | Phosphoglycan beta 1,3 galactosyltransferase                 |
| LDBPK_333350               | 0.1975  | 1.6471                      | 2.0000                      | 1.8236                 | Down       | Cation transporter                                           |
| LDBPK_201240               | 0.0697  | 2.0279                      | 1.5368                      | 1.7824                 | Down       | Calpain-like cysteine peptidase                              |
| LDBPK_282140               | 0.1783  | 1.591                       | 1.9453                      | 1.7682                 | Down       | Protein kinase                                               |
| LDBPK_010380               | 0.1392  | 1.5476                      | 1.9052                      | 1.7264                 | Down       | Hypothetical protein                                         |
| LDBPK_020490               | 0.1031  | 1.8661                      | 1.5801                      | 1.7231                 | Down       | Hypothetical protein                                         |
| LDBPK_250760               | 0.0092  | 1.6586                      | 1.729                       | 1.6939                 | Down       | Eukaryotic initiation factor 5a                              |
| LDBPK_343170               | 0.0488  | 1.8276                      | 1.5368                      | 1.6823                 | Down       | Hypothetical protein                                         |
| LDBPK_211620               | 0.0028  | 1.6358                      | 1.6817                      | 1.6588                 | Down       | Hypothetical protein                                         |
| LDBPK_170650               | 0.0082  | 1.6245                      | 1.6817                      | 1.6531                 | Down       | Hypothetical protein                                         |
| LDBPK_322820               | 0.0336  | 1.4948                      | 1.8025                      | 1.6487                 | Down       | Hypothetical protein                                         |
| LDBPK_161140               | 0.0423  | 1.6471                      | 1.6471                      | 1.6472                 | Down       | Hypothetical protein                                         |
| LDBPK_352310               | 0.0013  | 1.6471                      | 1.6471                      | 1.6472                 | Down       | ATP-grasp domain containing protein                          |
| LDBPK_291230               | 0.0083  | 1.5583                      | 1.6934                      | 1.6259                 | Down       | Tryparedoxin-like protein                                    |
| LDBPK_090760               | 0.0052  | 1.5691                      | 1.6702                      | 1.6197                 | Down       | Hypothetical protein                                         |
| LDBPK_351020               | 0.0577  | 1.4339                      | 1.8025                      | 1.6182                 | Down       | Casein kinase I                                              |
| LDBPK_352870               | 0.0436  | 1.6471                      | 1.58                        | 1.6136                 | Down       | Major facilitator superfamily                                |
| LDBPK_241790               | 0.0256  | 1.7171                      | 1.4948                      | 1.6060                 | Down       | Cell division cycle protein 20                               |
| LDBPK_131140               | 0.0431  | 1.4641                      | 1.7291                      | 1.5966                 | Down       | Thiamin pyrophosphokinase                                    |
| LDBPK_341720               | 0.0650  | 1.464                       | 1.7171                      | 1.5906                 | Down       | Amastin-like surface protein                                 |
| LDBPK_321400               | 0.0273  | 1.4539                      | 1.6934                      | 1.5737                 | Down       | Cleavage and polyadenylation specificity factor-like protein |
| LDBPK_230370               | 0.1138  | 1.4439                      | 1.6934                      | 1.5687                 | Down       | Hypothetical protein                                         |
| LDBPK_281570               | 0.2509  | 1.6934                      | 1.4439                      | 1.5687                 | Down       | Hypothetical protein                                         |
| LDBPK_110520               | 0.0365  | 1.4948                      | 1.6132                      | 1.5541                 | Down       | Nucleobase transporter                                       |
| LDBPK_333370               | 0.2003  | 1.4142                      | 1.6586                      | 1.5364                 | Down       | Hypothetical protein                                         |
| LDBPK_350380               | 0.1279  | 1.4339                      | 1.6358                      | 1.5349                 | Down       | Thioredoxin                                                  |
| LDBPK_320290               | 0.0038  | 1.4948                      | 1.5691                      | 1.5320                 | Down       | B9 domain containing protein 1                               |
| LDBPK_210190               | 0.0280  | 1.6021                      | 1.4339                      | 1.5180                 | Down       | Serine/threonine protein kinase                              |

Table S4: Upregulated genes in HAT4-nulls

| Probe Name/<br>Gene number | P value | Fold Change<br>experiment 1 | Fold Change<br>experiment 2 | Average<br>Fold Change | Regulation | Description                                  |
|----------------------------|---------|-----------------------------|-----------------------------|------------------------|------------|----------------------------------------------|
| LDBPK_060910               | 0.0019  | 3.9708                      | 3.7914                      | 3.8811                 | Up         | Acyl-coenzyme a dehydrogenase                |
| LDBPK_060870               | 0.0019  | 3.5122                      | 3.8839                      | 3.6981                 | Up         | Hypothetical protein                         |
| LDBPK_060880               | 0.0034  | 3.432                       | 3.7994                      | 3.6157                 | Up         | Hypothetical protein                         |
| LDBPK_060890               | 0.0004  | 3.385                       | 3.4045                      | 3.3948                 | Up         | Dihydrofolate reductase-thymidylate synthase |
| LDBPK_060900               | 0.0011  | 3.2403                      | 3.4812                      | 3.3608                 | Up         | Arginine N-methyltransferase type III- PRMT7 |
| LDBPK_060860               | 0.0015  | 3.1912                      | 3.4392                      | 3.3152                 | Up         | Lipin                                        |
| LDBPK_010600               | 0.0003  | 2.8284                      | 2.9105                      | 2.8695                 | Up         | Hypothetical protein                         |
| LDBPK_180180               | 0.3644  | 1.9675                      | 1.8255                      | 1.8965                 | Up         | Hypothetical protein                         |
| LDBPK_201420               | 0.0020  | 1.778                       | 1.7044                      | 1.7412                 | Up         | Pumilio protein 9                            |
| LDBPK_262260               | 0.0103  | 1.6794                      | 1.7794                      | 1.7294                 | Up         | Hypothetical protein                         |
| LDBPK_354910               | 0.0031  | 1.5845                      | 1.5272                      | 1.5559                 | Up         | Proteasome alpha 1 subunit                   |
| LDBPK_180190               | 0.0204  | 1.5003                      | 1.5856                      | 1.5430                 | Up         | Hypothetical protein                         |
| LDBPK_364440               | 0.2276  | 1.552                       | 1.5096                      | 1.5308                 | Up         | Hypothetical protein                         |
| LDBPK_181670               | 0.0205  | 1.5557                      | 1.5055                      | 1.5306                 | Up         | Hypothetical protein                         |
| LDBPK_313300               | 0.0448  | 1.5353                      | 1.5142                      | 1.5248                 | Up         | Protein kinase                               |

Table S5: Flow cytometry analysis of HU-synchronized HAT4-nulls expressing LdCdc20-eGFP ectopically

| Time-points |      | Ld1S-neo/hyg/bleo | LdHAT4-KO/blecherry | LdHAT4-KO/Cdc20-eGFP |
|-------------|------|-------------------|---------------------|----------------------|
| HU          | G1   | 65.14±2.26        | 64.87±0.82          | 67.21±1.88           |
|             | S    | 21.15±1.59        | 22.18±1.10          | 18.74±2.09           |
|             | G2/M | 12.67±0.95        | 12.46±0.91          | 13.36±0.91           |
| 4.5h R      | G1   | 11.19*            | 14.88*              | 16.32*               |
|             | S    | 51.12*            | 57.48*              | 52.09*               |
|             | G2/M | 37.62*            | 27.68*              | 32.60*               |
| 8h R        | G1   | 41.41±1.13        | 16.27±1.01          | 39.35±0.90           |
|             | S    | 22.08±1.07        | 23.99±0.55          | 23.79±0.71           |
|             | G2/M | 35.86±2.20        | 60±1.31             | 37.05±1.34           |
| 10h R       | G1   | 46.22±0.64        | 24.51±1.07          | 47.79±1.76           |
|             | S    | 21.80±2.82        | 30.61±0.32          | 21.18±2.51           |
|             | G2/M | 31.47±2.97        | 44.92±1.53          | 31±2.87              |

Three independent experiments were carried out. In every experiment, for each time-point 30,000 events were recorded per cell line. Numbers represent percent of analyzed cells (mean of three experiments) and numbers following ± sign represent s.e.m. values. \* indicates mean of two experiments. HU: hydroxyurea.



Table S6: Flow cytometry analysis of FP-synchronized HAT4-nulls expressing LdCdc20-eGFP ectopically

| Timepoints |      | Ld1S-neo/hyg/bleo | LdHAT4-KO/blecherry | LdHAT4-KO/Cdc20-eGFP |
|------------|------|-------------------|---------------------|----------------------|
| FP         | G1   | 5.85±0.60         | 6.44±1.39           | 3.80±0.36            |
|            | S    | 9.59±0.17         | 10.28±2.71          | 7.37±1.20            |
|            | G2/M | 84.78±0.54        | 83.31±3.88          | 89.11±0.99           |
| 1h R       | G1   | 7.22±0.12         | 8.36±1.28           | 5.72±0.65            |
|            | S    | 16.56±2.12        | 15.16±4.16          | 19.87±5.20           |
|            | G2/M | 76.36±2.13        | 76.58±5.45          | 74.83±5.80           |
| 1.5h R     | G1   | 41.65*            | 26.62*              | 40.5*                |
|            | S    | 17.66*            | 14.50*              | 12.85*               |
|            | G2/M | 40.61*            | 58.71*              | 46.3*                |
| 2h R       | G1   | 71.99*            | 50.01*              | 67.86*               |
|            | S    | 16.14*            | 11.52*              | 16.54*               |
|            | G2/M | 10.76*            | 38.41*              | 13.74*               |

Three independent experiments were carried out. In every experiment, for each time-point 30,000 events were recorded per cell line. Numbers represent percent of analyzed cells (mean of three experiments) and numbers following ± sign represent s.e.m. values. \* indicates mean of two experiments. FP: flavopiridol.
